# Supplementary material
Source: PubMed Central journal article supplement (PMC2910633)
Supplement: supp_51_8_3893__1.pdf [file supp_51_8_3893__1.pdf]

Supplementary Table S1. Primer sequences used in qRT-PCR

| <b>Table 2: Primer Target, Product Size and Sequences</b> |      |                        |                        |
|-----------------------------------------------------------|------|------------------------|------------------------|
| Target Gene                                               | Size | F Sequence             | R Sequence             |
| COL1A1                                                    | 165  | TGGTGCTAAGGGTGATGCTG   | CCATCTTTGCCAGGAGAGC    |
| COL7A1                                                    | 221  | CTCGTTGGGATAGTGATGACC  | AGTACCTGTCCCCTGGCTCT   |
| COL9A1                                                    | 198  | TGGAGCTATAGGTCTCCAGGT  | TCAGGCCCTTTGTAAATGC    |
| COL12A1                                                   | 174  | AGGTTCCGGCTAACACATTTTC | GTCTCCACCCTCCTTTGTGA   |
| MMP7                                                      | 232  | CGGATGGTAGCAGTCTAGGG   | TGAATGGATGTTCTGCCTGA   |
| NFATC4                                                    | 204  | AGGAAGTGAGTGAGATCATTGG | CAGACAGAAGCTGGGGAAAG   |
| TLR6                                                      | 120  | AGCCTGCCAGTTAGAGACAGC  | ATTTGGGAAAGCAGAGTGGA   |
| TMED1                                                     | 250  | CAAGGAGTCCATTGAGACCA   | GTCCCCTTCTTCCTCCAT     |
| VCAN                                                      | 154  | TGCATGAACCCATCTGCATAC  | TTCGCCATTTTAGGGATCAG   |
| COL19A1                                                   | 185  | GACTTCAGCTCTGGGTTTGC   | CTCCAGTGGCAAGGAAATGT   |
| LAMB1                                                     | 189  | CTCCAGTGGCAAGGAAATGT   | CCTTGTTACCTCAGCCATT    |
| SOCS1                                                     | 121  | GAACTGCTTTTTCGCCCTTA   | CTCGAAGAGGCAGTCGAAG    |
| NFATC1                                                    | 218  | GCAAGCCGAATTCTCTGGT    | GACGTCGTTTCTGCGTCTTT   |
| <b>ARG1</b>                                               | 191  | CAAAACAGGGCTACTCTCAGG  | TCGGATGTTTCCACATTTACTT |
| <b>CCL18</b>                                              | 226  | CAGGTGTCATCCTCCTAACC   | GGGCATAGCAGATGGGACT    |
| <b>NOS2</b>                                               | 198  | TCAGCTCAAGAGCCAGAAGC   | GGCCCTGTGACCTCAGATAA   |
| <i>HUPO1</i>                                              | 208  | GCTGCAGCAGAGGAGAAGA    | AGACCAAAGCCCATGTCATC   |
