# Supplementary material
Source: PubMed Central journal article supplement (PMC2910633)
Supplement: supp_51_8_3893__2.pdf [file supp_51_8_3893__2.pdf]

**Supplementary Table S2.**

Visual absence presence gene expression scoring of COL1A1 expression from the Superarray assay

| COL1A1    | Absent | Present | Total |
|-----------|--------|---------|-------|
| Controls  | 9      | 2       | 11    |
| Trichasis | 5      | 6       | 11    |
| Total     | 14     | 8       | 22    |

COL1A1: Fisher's exact test p-value = 0.09135
