# Supplementary material
Source: PubMed Central journal article supplement (PMC2910633)
Supplement: supp_51_8_3893__3.pdf [file supp_51_8_3893__3.pdf]

**Supplementary Table S4.**

Summary of genes expressed the conjunctiva of TT cases and controls by Superarray assay.

| <b>Gene expression detected</b>                                              |                                                                                                              |                                                                                                                                        |
|------------------------------------------------------------------------------|--------------------------------------------------------------------------------------------------------------|----------------------------------------------------------------------------------------------------------------------------------------|
| <b>ECM</b>                                                                   |                                                                                                              |                                                                                                                                        |
| Cases only (6 genes)                                                         | All cases and controls (2 genes)                                                                             | Controls only (1 gene)                                                                                                                 |
| LAMA5, MMP13, CTNNA1, SELL, TGFBI<br>TIMP1                                   | ITGAX, ITGB1                                                                                                 | ITGA3                                                                                                                                  |
| <b>Th123</b>                                                                 |                                                                                                              |                                                                                                                                        |
| Cases only (4 genes)                                                         | All cases and controls (3 genes)                                                                             | Controls only (3 genes)                                                                                                                |
| <i>TMED1</i> , CCL5, BCL3<br>IL1R2                                           | NFATC4, STAT6<br>HAVCR2                                                                                      | IL4R, NFKB1, NFATC3                                                                                                                    |
| <b>Gene expression not detected</b>                                          |                                                                                                              |                                                                                                                                        |
| <b>Th123</b>                                                                 |                                                                                                              |                                                                                                                                        |
| Cases only (7 genes)                                                         | Neither (8 genes)                                                                                            | Controls only (6 genes)                                                                                                                |
| TGFB3, PCGF2, TFCP2,<br>IL9, GLMN, CCR3, <i>NFATC1</i>                       | IL2, CCR4, SOCS6, CCR9,<br>CD28, IL12B<br>TNFRSF9, GFI1                                                      | NFATC2, LAG3, IRF4<br>CSF2, IL27, SOCS7                                                                                                |
| <b>ECM</b>                                                                   |                                                                                                              |                                                                                                                                        |
| Cases only (9 genes)                                                         | Neither (14 genes)                                                                                           | Controls (16 genes)                                                                                                                    |
| MMP11, TIMP2, LAMB4<br>LAMA1, SELE, ITGB3<br>ITGA11, COL12A1<br><i>LAMB1</i> | LAMA4, COL5A1, HAS1<br>ITGA10, ITGA7, ITGAV<br>COL16A1, COL14A1<br>ITGB6, LAMA2, NCAM1<br>SGCE, THBS3, THBS4 | MMP20, LAMC1, VTN<br>COL4A3, CLEC3B<br>MMP24, ITGA4, COL5A3<br>FN1, ITGA8, <i>COL9A1</i><br>SPP1, MMP8, <i>COL19A1</i><br>MMP16, MMP17 |
| <b>Most abundant mRNA expression</b>                                         |                                                                                                              |                                                                                                                                        |
| <b>Highest expression (signal intensity) top 5 from each array</b>           |                                                                                                              |                                                                                                                                        |
| <b>Th123</b>                                                                 |                                                                                                              |                                                                                                                                        |
| Cases                                                                        | Controls                                                                                                     |                                                                                                                                        |
| JUND, JUNB, BCL3, NFKB1, IRF1                                                | JUND, IL1R1, JUNB, NFATC3, NFKB1                                                                             |                                                                                                                                        |
| <b>ECM</b>                                                                   |                                                                                                              |                                                                                                                                        |
| Cases                                                                        | Controls                                                                                                     |                                                                                                                                        |
| TGFBI, TIMP1, ITGA3, ITGAX, ITGB1                                            | MMP13, ITGA3, TIMP1, ITGAX, ITGB1                                                                            |                                                                                                                                        |
| <b>Least abundant mRNA expression</b>                                        |                                                                                                              |                                                                                                                                        |
| <b>Lowest expression intensity (lowest 5 from each array)</b>                |                                                                                                              |                                                                                                                                        |
| <b>Th123</b>                                                                 |                                                                                                              |                                                                                                                                        |
| Cases                                                                        | Controls                                                                                                     |                                                                                                                                        |
| IL18, CSF2, IL27, IRF4, ICOS                                                 | TFCP2, GLMN, IL18, TGFB3, CCR3                                                                               |                                                                                                                                        |
| <b>ECM</b>                                                                   |                                                                                                              |                                                                                                                                        |
| Cases                                                                        | Controls                                                                                                     |                                                                                                                                        |
| ITGA8, <i>COL9A1</i> , SPP1, MMP8, <i>COL19A1</i>                            | COL12A1, MMP12, MMP16, MMP20, LAMC1                                                                          |                                                                                                                                        |
