# Supplementary material
Source: PubMed Central journal article supplement (PMC2910633)

**Supplementary Figure S1.** Raw SuperArray images of each individual array captured by the Bio-rad CCD chemi-doc system. In the top panels the ECM arrays are shown and in the bottom panel the Th1/Th2/Th3 arrays are shown. Each gene is represented by a tetra-spot arrangement. All the arrays are in the same orientation the reference genes occupy the bottom row of spots in each array beginning with GAPDH (A16) and ending with BASC2 (H16). RPS27A (A1) is located in the top left hand corner of each array in each image. MMP7 is located at position B12. The complete layouts of the arrays are shown in figure 1(a) and (c). Images were downloaded to the GArray analysis suite and Matlab array processing tools and used to generate heat maps and numeric output for statistical analysis of differential expression.

ECM ARRAYS

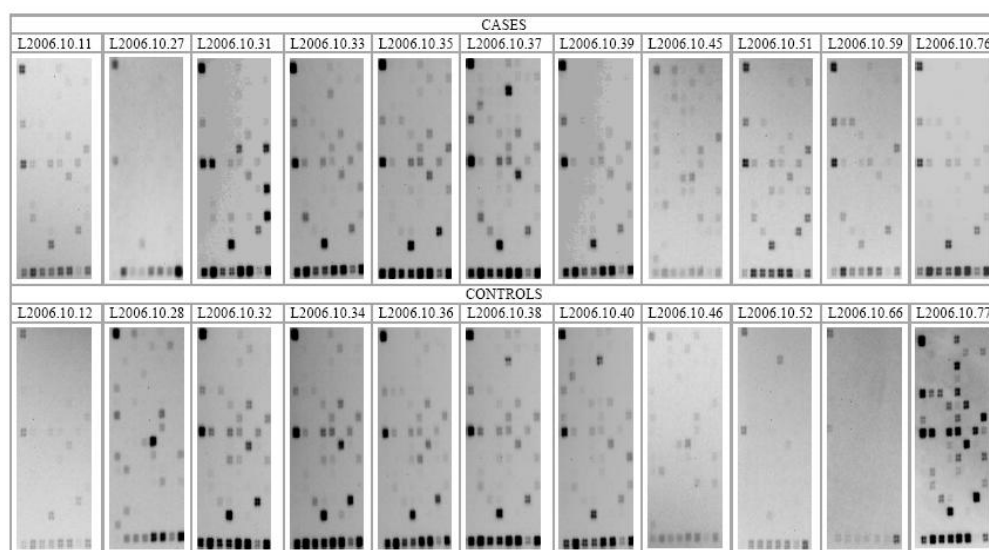

Th1/Th2/Th3 ARRAY

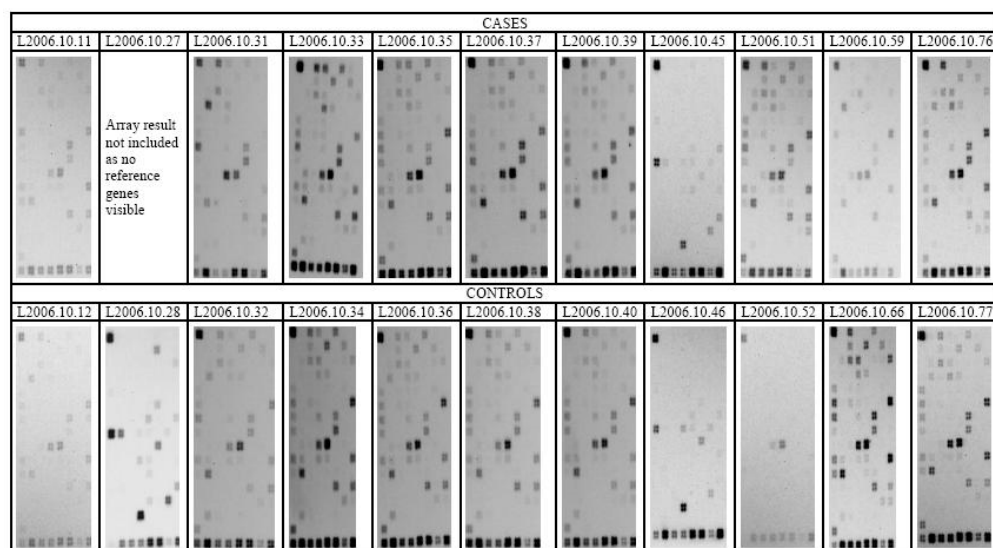

Supplement: supp_51_8_3893__4.pdf [file supp_51_8_3893__4.pdf]
